# Supplementary material for: Burosumab in management of X-linked hypophosphataemia: a retrospective cohort study of growth and serum phosphate levels
Source: HighWire-hosted journal article supplement (doi:10.1136/archdischild-2022-324962), 2023-01-30
Supplement: archdischild-2022-324962supp001_data_supplement.pdf [file archdischild-2022-324962supp001_data_supplement.pdf]

| <b>Supplementary table 1. Reference ranges for age and sex-specific markers</b> |                            |               |             |
|---------------------------------------------------------------------------------|----------------------------|---------------|-------------|
| <b>Analyte</b>                                                                  | <b>Reference intervals</b> |               |             |
|                                                                                 | <b>Age</b>                 | <b>Female</b> | <b>Male</b> |
| <b>Serum alkaline phosphatase, ALP (U/L)</b>                                    | 1-3y                       | 145-320       | 145-320     |
|                                                                                 | 3-6y                       | 150-380       | 150-380     |
|                                                                                 | 6-9y                       | 175-420       | 175-420     |
|                                                                                 | 9-11y                      | 130-560       | 135-530     |
|                                                                                 | 11-13y                     | 105-420       | 200-495     |
|                                                                                 | 13-15y                     | 70-230        | 130-525     |
|                                                                                 | >15y                       | 30-126        | 30-126      |
| <b>Serum phosphate (mmol/L)</b>                                                 | 5d-3y                      | 1.2-2.1       |             |
|                                                                                 | 3-10y                      | 1.2-1.8       |             |
|                                                                                 | 10-15y                     | 1.1-1.75      |             |
|                                                                                 | >15y                       | 0.8-1.45      |             |
| <b>TmP/GFR (mmol/L)</b>                                                         | 7m-2y                      | 1.10-2.70     |             |
|                                                                                 | 2-4y                       | 1.04-2.79     |             |
|                                                                                 | 4-6y                       | 1.05-2.60     |             |
|                                                                                 | 6-8y                       | 1.26-2.35     |             |
|                                                                                 | 8-10y                      | 1.10-2.31     |             |
|                                                                                 | 10-12y                     | 1.15-2.58     |             |
|                                                                                 | 12-15y                     | 1.18-2.09     |             |
| >15y                                                                            | 0.80-1.35                  |               |             |
